# Supplementary material for: A flexible p-CuO/n-MoS2 heterojunction photodetector with enhanced photoresponse by the piezo-phototronic effect
Source: Royal Society of Chemistry journal article supplement (doi:10.1039/c6mh00568c), 2017-01-01
Supplement: c6mh00568c1.pdf [file c6mh00568c1.pdf]

## Supplementary information

### A Flexible p-CuO/n-MoS<sub>2</sub>Heterojunction Photodetector with Enhanced Photoresponse by Piezo-phototronicEffect

*Ke Zhang<sup>1†</sup>, Mingzeng Peng<sup>1†</sup>, Wei Wu<sup>1</sup>, Junmeng Guo<sup>1</sup>, Guoyun Gao<sup>1</sup>, YudongLiu<sup>1</sup>, Jinzong Kou<sup>1</sup>,  
Rongmei Wen<sup>1</sup>, Ying Lei<sup>2</sup>, Aifang Yu<sup>1</sup>, Yang Zhang<sup>1</sup>, Junyi Zhai<sup>1\*</sup> and ZhongLin Wang<sup>1,2\*</sup>*

1 Beijing Institute of Nanoenergy and Nanosystems, Chinese Academy of Science; National Center for  
Nanoscience and Technology (NCNST), Beijing 100083, P.R. China

2 School of Materials Science and Engineering, Georgia Institute of Technology, Atlanta, Georgia  
30332-0245, United States

\*Corresponding Author. E-mail: [jyzhai@binn.cas.cn](mailto:jyzhai@binn.cas.cn) and [zlwang@gatech.edu](mailto:zlwang@gatech.edu).

† These authors contributed equally to this work.

## Contents:

### 1. The diagram of tensile strain loading apparatus.

The photoresponse measurement of p-CuO/n-MoS<sub>2</sub> heterojunction photodetector mainly used Raman confocal microscopy and high precision manual translation table, as shown in **Figure S1**. We firstly defined the position of heterojunction photodetector on PET substrate by CCD imaging system under 50×objective lens. Next, the tensile strain was applied by bending PET substrate using high precision manual translation table and photoresponse characteristic was measured under different strain and laser power conditions.

### 2. The photoresponse of p type CuO film and monolayer MoS<sub>2</sub>.

The I-V characteristics of p-CuO film along with the increase of tensile strain in dark environment and the changes of current under different optical power intensities are shown in **Figure S1a** and **S2b**. The results indicate the photoresponse of pure p type CuO film is quite small and it has almost no effect on the performance of whole p-n heterojunction photodetector. Monolayer MoS<sub>2</sub> photodetector with Cr/Au ohmic contact just performs the piezoresistive effect with increasing tensile strain, as shown in **Figure S2c**. The photosensitivity ( $\Delta I/I_{\text{dark}}$ ) with changes of tensile strain has an equivalent effect on the device performance under both dark and illumination conditions (**Figure S2d**).

### 3. The operational stability of the photodetector.

The time-dependent photoresponse of p-CuO/n-MoS<sub>2</sub> heterojunction photodetector to periodical on/off illumination under different tensile strain is shown in **Figure S3**. The device shows a good stability in a long time on/off

illumination cycles.

#### **4. The relationship between photoresponsivity and light powers under different external tensile strain.**

The photoresponsivity( $R$ ) of p-CuO/n-MoS<sub>2</sub> heterojunction photodetector is calculated with the formula  $R=(I_{ph}-I_{dark})/P$ , where  $I_{ph}$  is photocurrent,  $I_{dark}$  is dark current and  $P$  is the light power density. The result in **Figure S4** shows the photoresponsivity reach to the maximum value 11.4 mA/W under the highest strain 0.65 % and low illumination 2.66 mW/cm<sup>2</sup>.

Figures in supplementary information

Figure S1

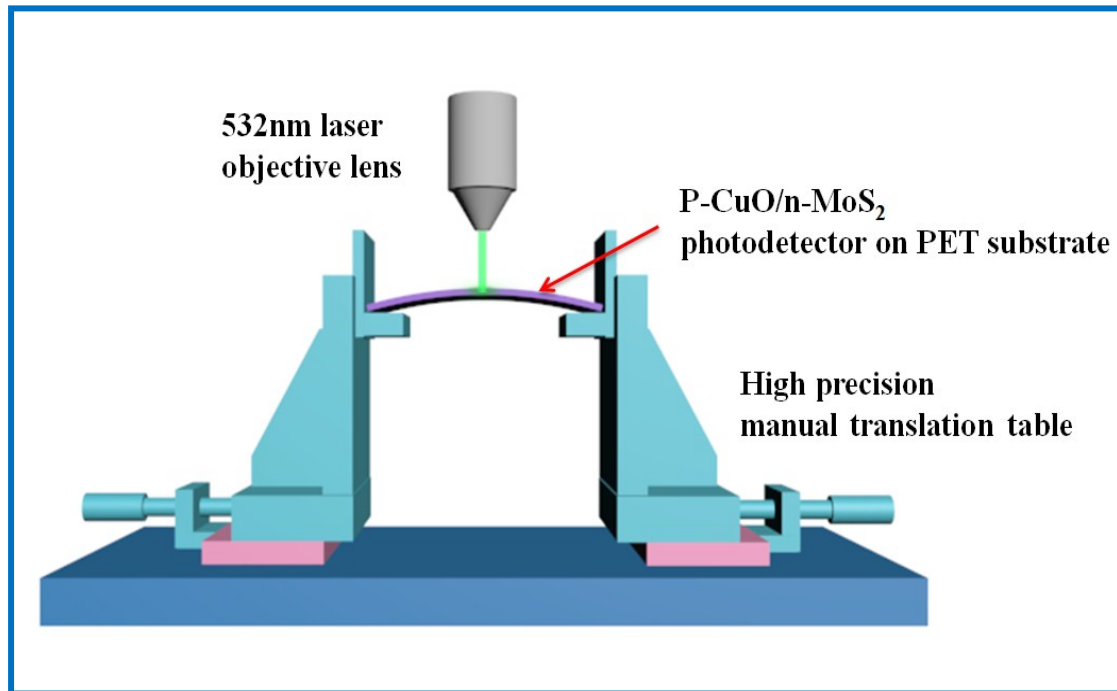

Figure S1. The diagram of tensile strain loading apparatus.

**Figure S2**

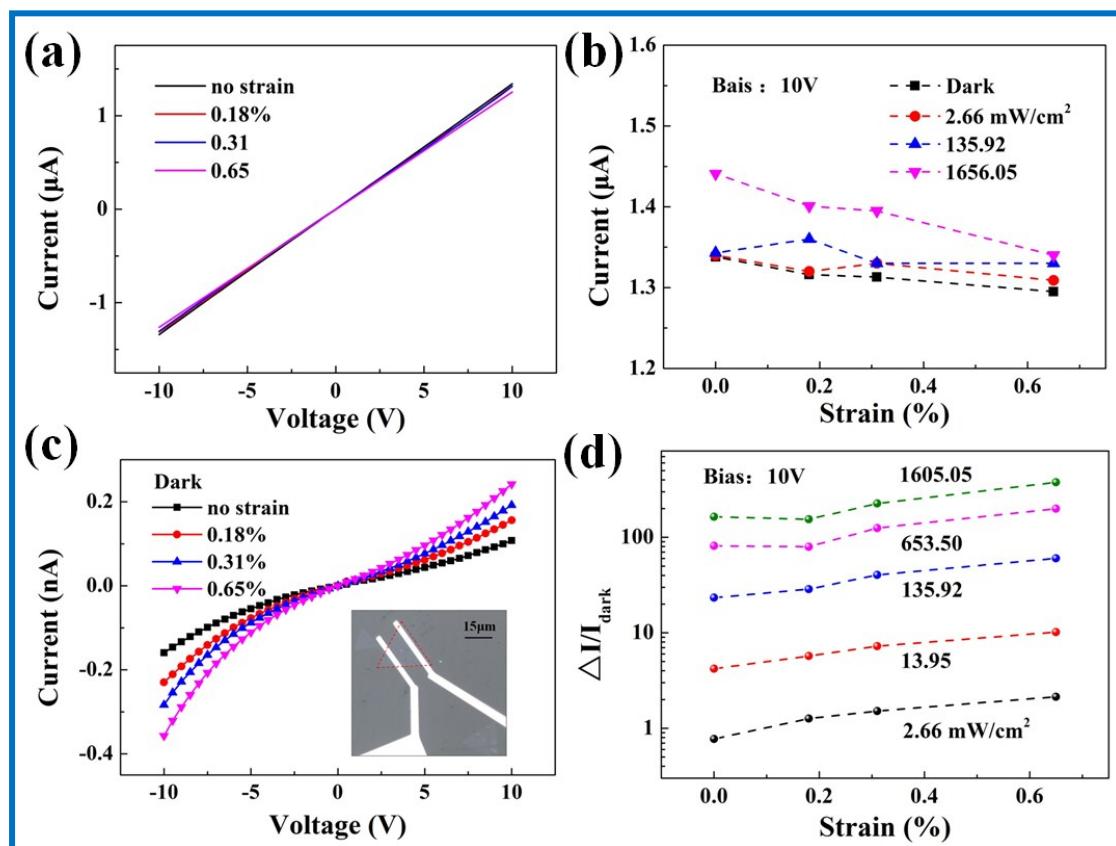

**Figure S2.** The photoresponse of photodetectors made of pure p-CuO film and monolayer n-MoS<sub>2</sub> upon tensile strain. (a) I-V characteristics of p-CuO film with the increase of tensile strain. (b) The changes of current of p-CuO film with increasing tensile strain under different optical power intensity at a bias of 10 V. (c) I-V characteristics of monolayer MoS<sub>2</sub> with the increase of tensile strain. (d) The changes of photosensitivity ( $\Delta I/I_{\text{dark}}$ ) of monolayer MoS<sub>2</sub> with increasing tensile strain under different optical power intensity at a bias of 10 V.

**Figure S3**

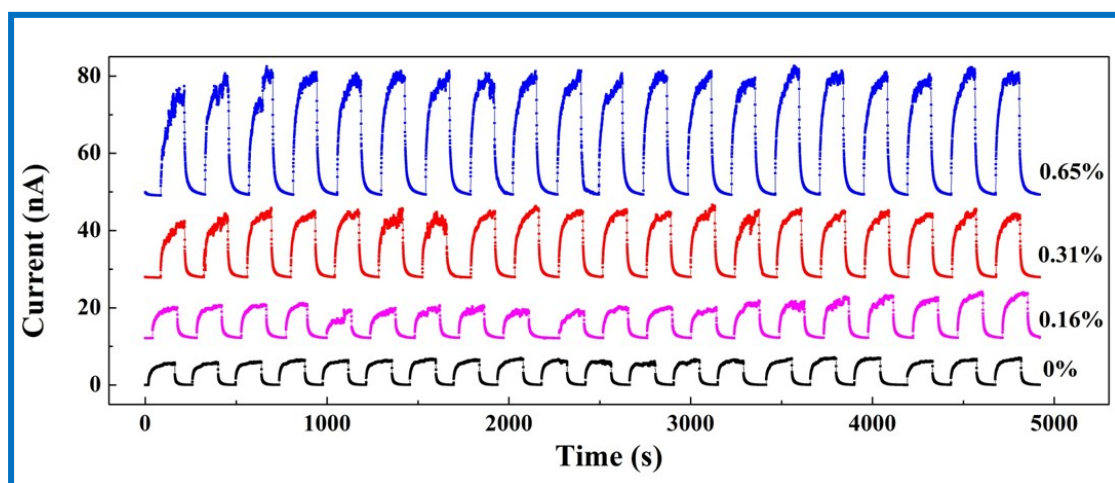

**Figure S3.** The time-dependent photoresponse of p-CuO/n-MoS<sub>2</sub> heterojunction photodetector to periodical on/off illumination under different tensile strains at bias of 10 V.

Figure S4

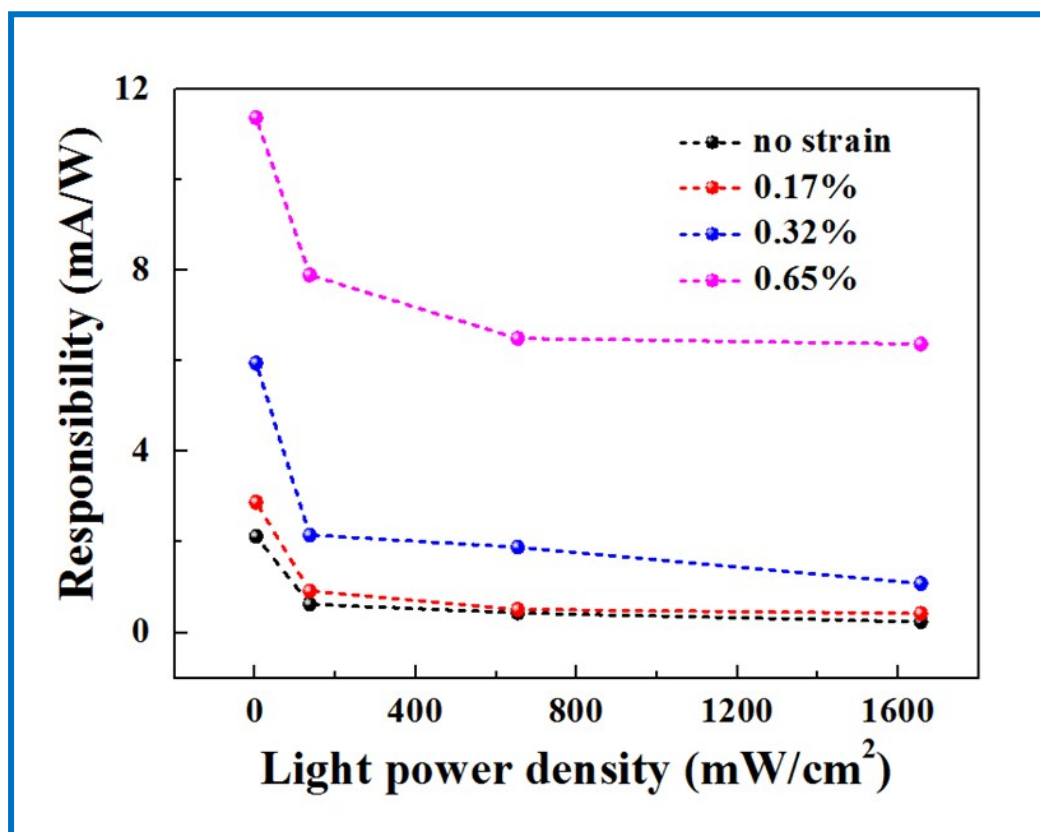

Figure S4. The photoresponsivity of p-CuO/n-MoS<sub>2</sub> heterojunction photodetector under different tensile strains.
